# Supplementary material for: Cellular arrangement impacts metabolic activity and antibiotic tolerance in Pseudomonas aeruginosa biofilms
Source: PubMed Central journal article supplement (PMC10833521; doi:10.1371/journal.pbio.3002205), 2024-02-01
Supplement: pbio.3002205.s001.pdf [file pbio.3002205.s001.pdf]

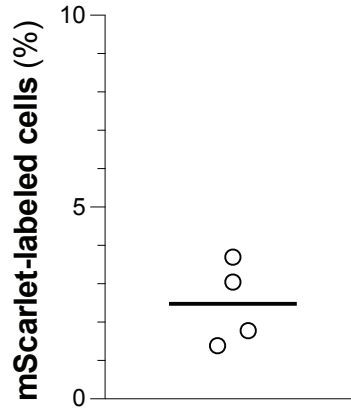

**S1 Fig. Expression of mScarlet does not impact fitness in macrocolony biofilms.** PA14 WT constitutively expressing mScarlet (2.5%) was mixed with PA14 WT (97.5%), spotted on 1% tryptone 1% agar plates, and grown for three days. The percentages of fluorescent cells were determined after three days of growth by homogenizing the macrocolonies and plating for colony-forming units (CFUs). ~2.5% of CFUs expressed mScarlet. Results for four biological replicates are shown. The data underlying this figure can be found in S1\_raw\_data.
