# Supplementary material for: Cellular arrangement impacts metabolic activity and antibiotic tolerance in Pseudomonas aeruginosa biofilms
Source: PubMed Central journal article supplement (PMC10833521; doi:10.1371/journal.pbio.3002205), 2024-02-01
Supplement: pbio.3002205.s002.pdf [file pbio.3002205.s002.pdf]

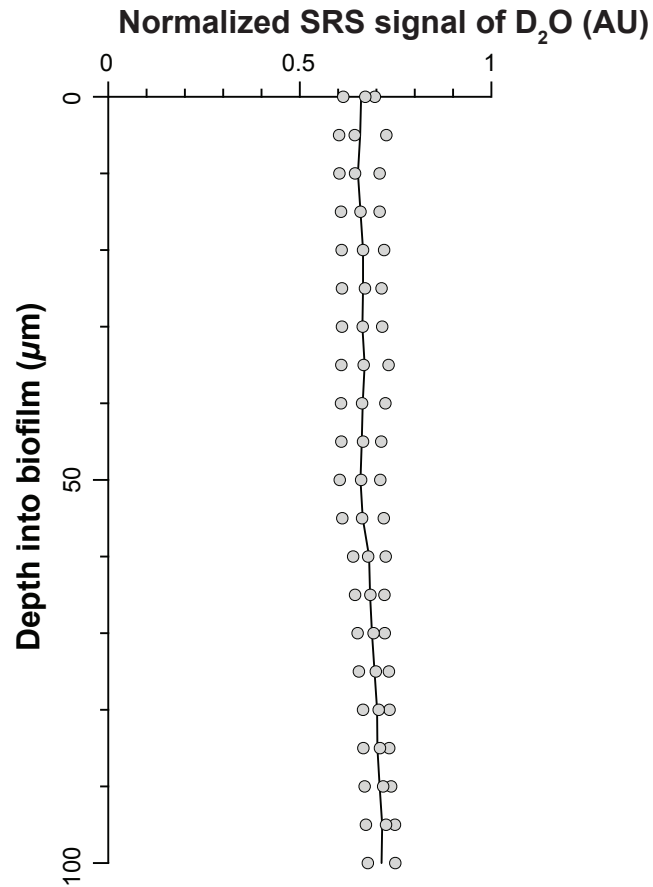

**S2 Fig.  $\text{D}_2\text{O}$  distribution is uniform in macrocolony biofilms.** Signal across depth detected for  $\text{D}_2\text{O}$  in live two-day-old PA14 biofilms imaged by SRS.  $\text{D}_2\text{O}$  is normalized to total protein. Results are shown for three biological replicates. The data underlying this figure can be found in S1\_raw\_data.
