# Supplementary material for: Cellular arrangement impacts metabolic activity and antibiotic tolerance in Pseudomonas aeruginosa biofilms
Source: PubMed Central journal article supplement (PMC10833521; doi:10.1371/journal.pbio.3002205), 2024-02-01
Supplement: pbio.3002205.s003.pdf [file pbio.3002205.s003.pdf]

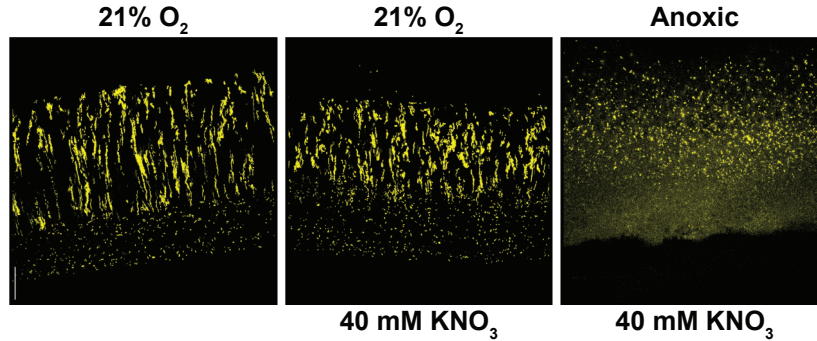

**S3 Fig. Anoxic conditions abrogate striation formation.** Fluorescence micrographs of thin sections from WT biofilms grown on 1% tryptone, 1% agar under oxic or anoxic conditions for 3 days. Where indicated, 40 mM potassium nitrate was included in the growth medium. Biofilm inocula contained 2.5% cells that constitutively express mScarlet. mScarlet fluorescence is colored yellow. Scale bar is 25  $\mu$ m and applies to all images.
