# Supplementary material for: Cellular arrangement impacts metabolic activity and antibiotic tolerance in Pseudomonas aeruginosa biofilms
Source: PubMed Central journal article supplement (PMC10833521; doi:10.1371/journal.pbio.3002205), 2024-02-01
Supplement: pbio.3002205.s005.pdf [file pbio.3002205.s005.pdf]

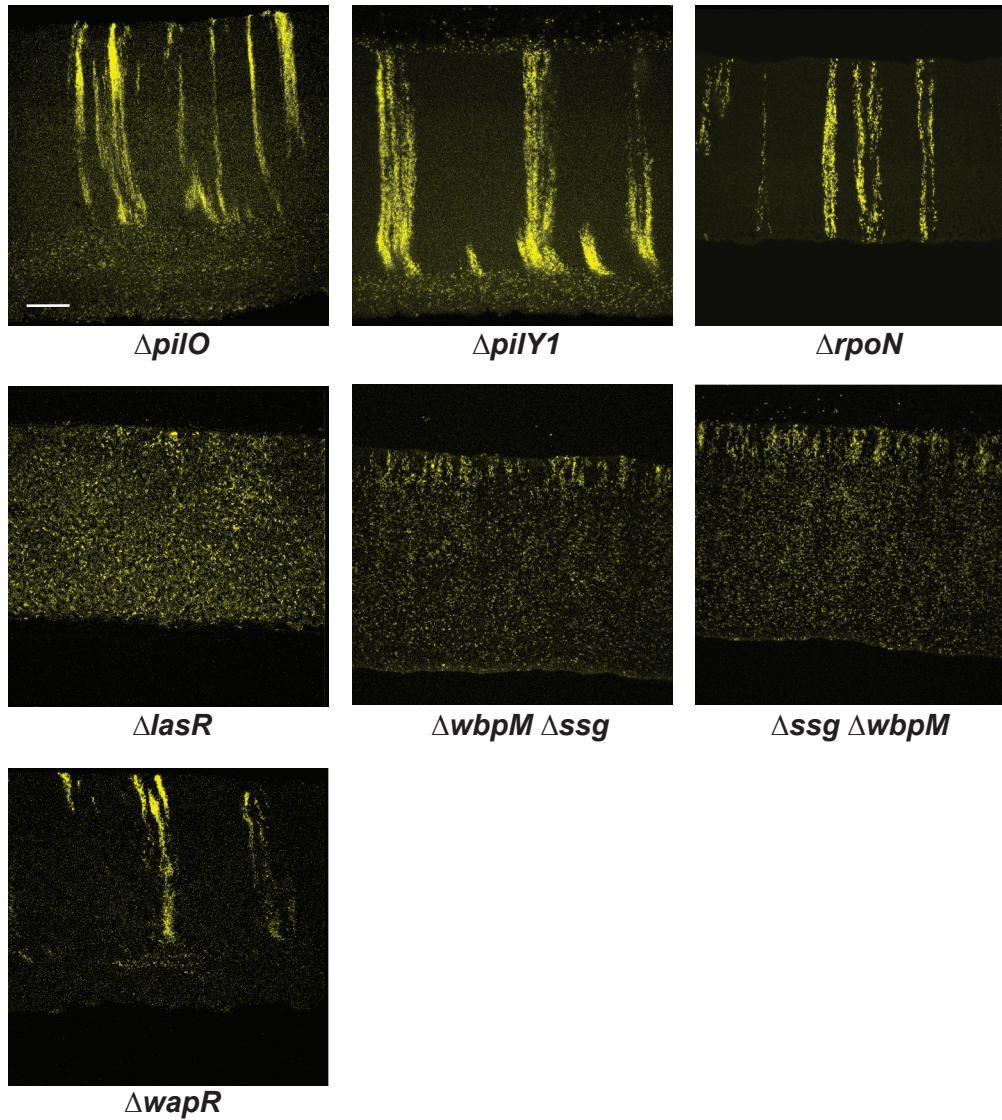

**S5 Fig. Mutations affecting global regulators, pilus synthesis, and O-antigen synthesis/attachment alter cell patterning in colony biofilms.** Fluorescence micrographs of thin sections from indicated mutant biofilms grown on 1% tryptone and 1% agar for three days. The biofilm inocula contained constitutive mScarlet-expressers at a frequency of 2.5%; 97.5% of the cells did not express a fluorophore. Scale bar is 25  $\mu$ m. Images are representative of at least two independent experiments and mScarlet fluorescence is colored yellow. Scale bar applies to all images.
