# Supplementary material for: Cellular arrangement impacts metabolic activity and antibiotic tolerance in Pseudomonas aeruginosa biofilms
Source: PubMed Central journal article supplement (PMC10833521; doi:10.1371/journal.pbio.3002205), 2024-02-01
Supplement: pbio.3002205.s008.pdf [file pbio.3002205.s008.pdf]

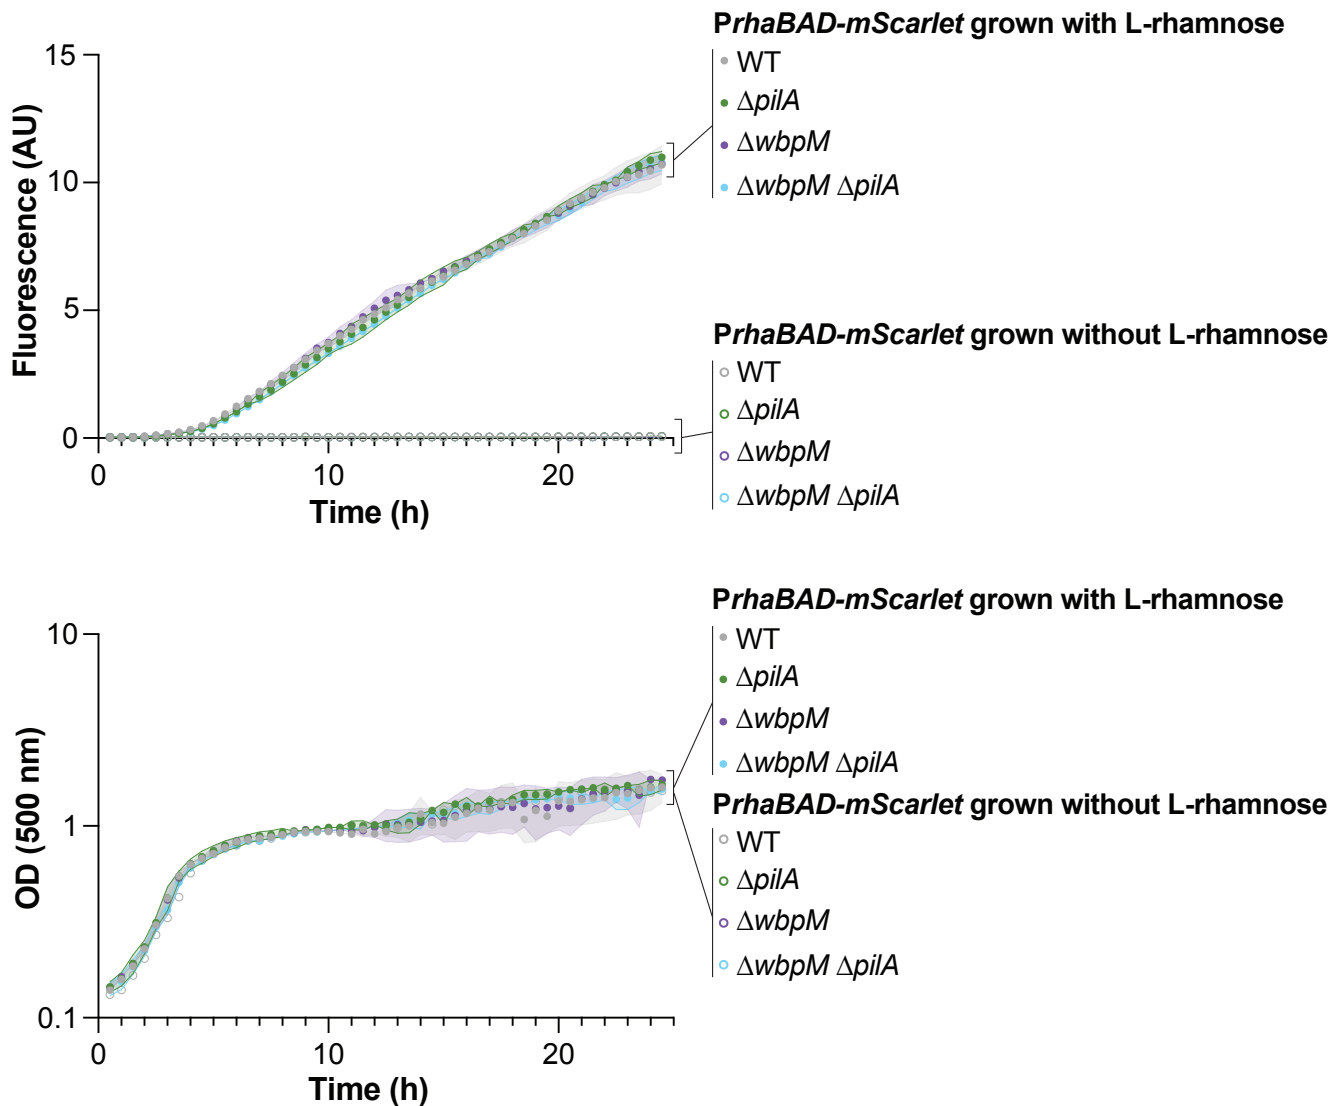

**S8 Fig. RhaSR-PrhaBAD-controlled mScarlet production in WT,  $\Delta wbpM$ ,  $\Delta pilA$ ,  $\Delta wbpM \Delta pilA$  strains is comparable during planktonic growth.** Changes in fluorescence (top) and optical density (bottom) for the indicated reporter strains during growth in liquid culture with or without the addition of 0.5% L-rhamnose. The data underlying this figure can be found in S1\_raw\_data.
