# Supplementary material for: Cellular arrangement impacts metabolic activity and antibiotic tolerance in Pseudomonas aeruginosa biofilms
Source: PubMed Central journal article supplement (PMC10833521; doi:10.1371/journal.pbio.3002205), 2024-02-01
Supplement: pbio.3002205.s009.pdf [file pbio.3002205.s009.pdf]

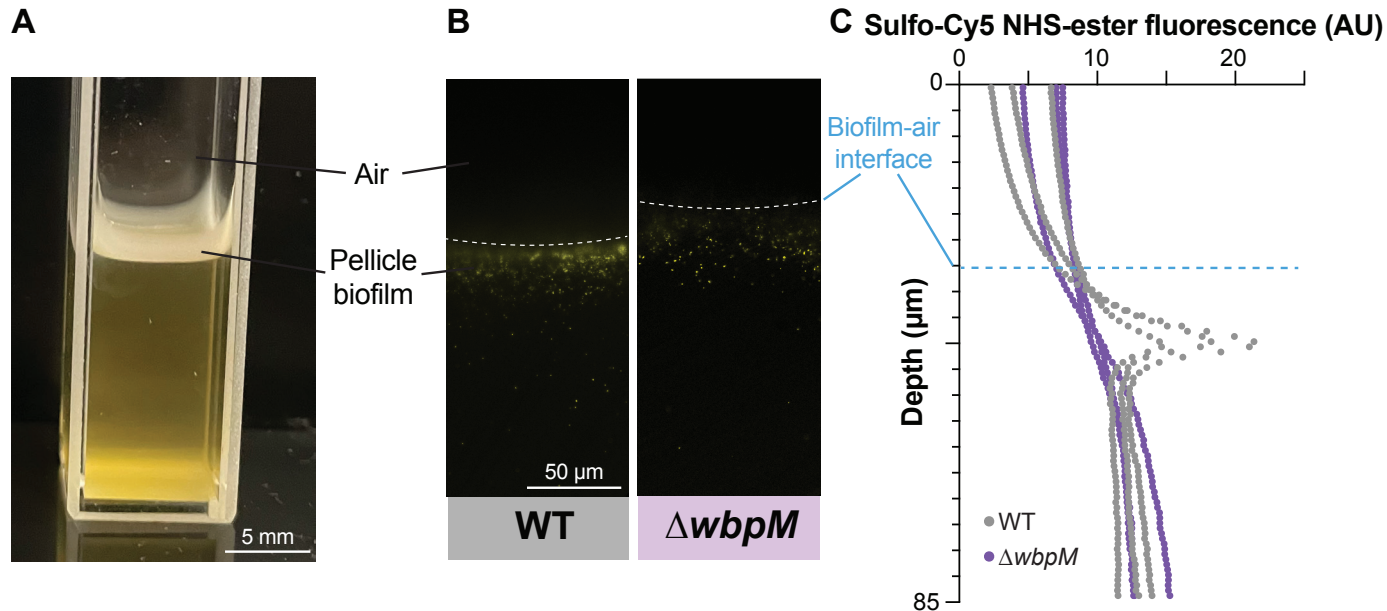

**S9 Fig. Dye distribution in live pellicle biofilm.** (A) Side view of a WT *P. aeruginosa* pellicle biofilm grown for three days in a cuvette. WT and  $\Delta wbpM$  form comparable pellicles. (B) Live light-sheet microscopy images of WT and  $\Delta wbpM$  mixing assay pellicle biofilms. Scale bar applies to both images. (C) Quantification of Sulfo-Cy5 NHS-ester fluorescence after addition to the medium below each pellicle biofilm. The signal was normalized by total sum. The data underlying this figure can be found in S1\_raw\_data.
