# Supplementary material for: Cellular arrangement impacts metabolic activity and antibiotic tolerance in Pseudomonas aeruginosa biofilms
Source: PubMed Central journal article supplement (PMC10833521; doi:10.1371/journal.pbio.3002205), 2024-02-01
Supplement: pbio.3002205.s010.pdf [file pbio.3002205.s010.pdf]

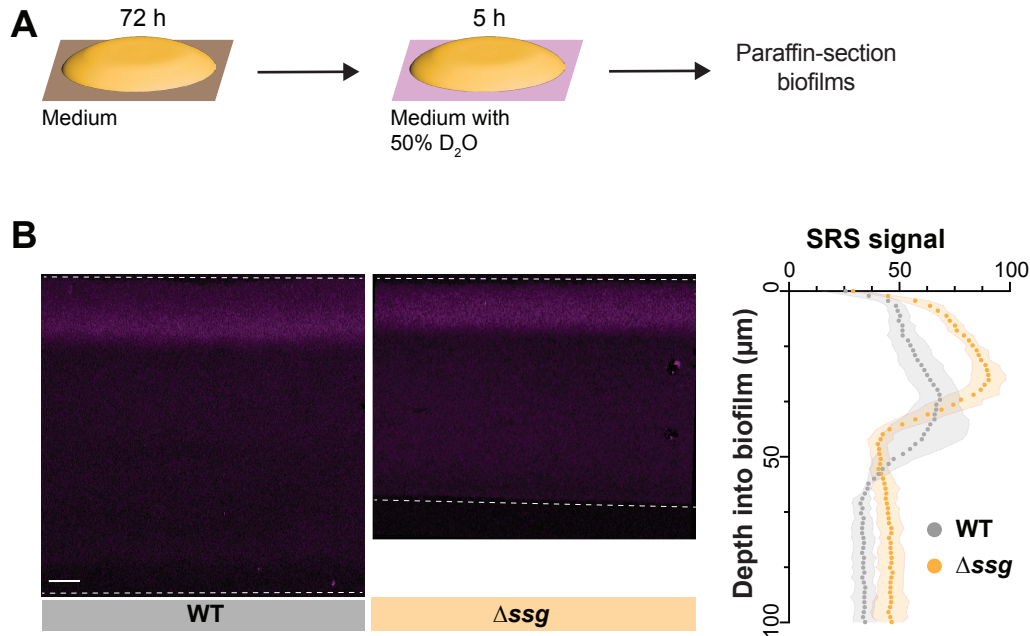

**S10 Fig. Metabolic activity profile within  $\Delta\text{ssg}$  biofilm.** (A) Schematic illustration of the experimental setup for growing *P. aeruginosa* biofilms on agar plates and their subsequent transfer to a medium containing 50% D<sub>2</sub>O. (B) SRS micrographs of WT and  $\Delta\text{ssg}$  biofilm thin-sections. Scale bar is 25  $\mu\text{m}$  and applies to both images. The data underlying this figure can be found in S1\_raw\_data.
