# Supplementary material for: Cellular arrangement impacts metabolic activity and antibiotic tolerance in Pseudomonas aeruginosa biofilms
Source: PubMed Central journal article supplement (PMC10833521; doi:10.1371/journal.pbio.3002205), 2024-02-01
Supplement: pbio.3002205.s011.pdf [file pbio.3002205.s011.pdf]

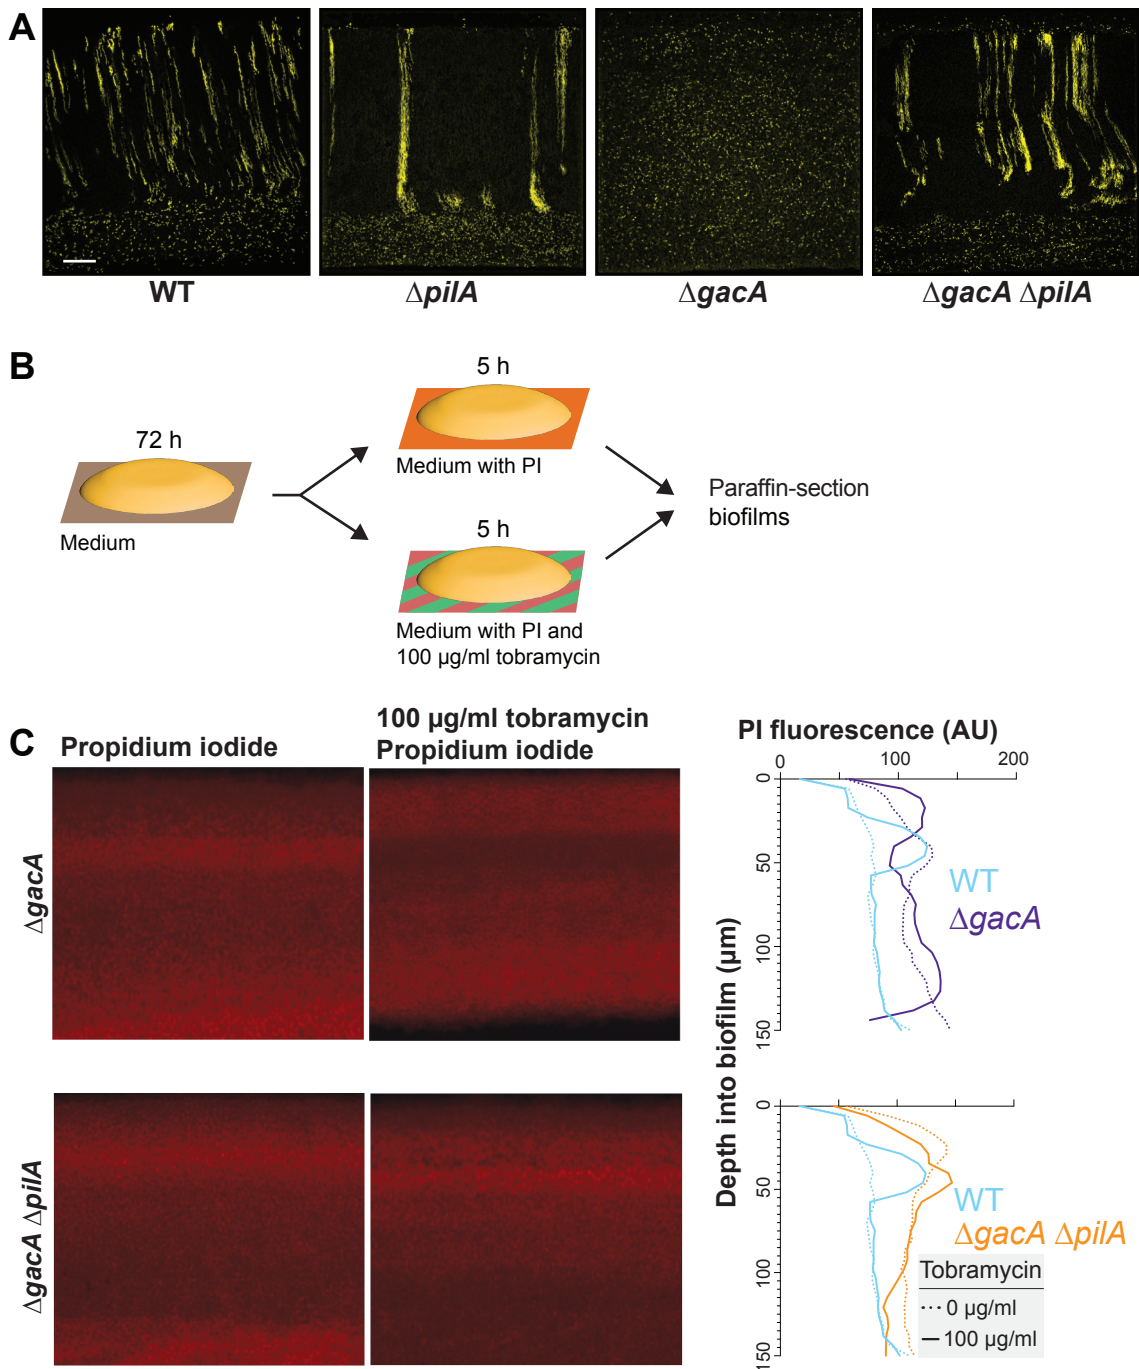

**S11 Fig. Mutations affecting cellular arrangement alter biofilm antibiotic tolerance profiles. (A)** Fluorescence micrographs of thin sections from indicated mutant biofilms grown on 1% tryptone and 1% agar for three days. The biofilm inocula contained 2.5% of cells that constitutively express mScarlet (shown as yellow); 97.5% did not express a fluorophore. Scale bar is 25  $\mu\text{m}$  and applies to all images. **(B)** Schematic illustration of the experimental setup for growing *P. aeruginosa* biofilms on agar plates and their subsequent transfer to a medium containing 50  $\mu\text{M}$  propidium iodide or 50  $\mu\text{M}$  propidium iodide + 100  $\mu\text{g/ml}$  tobramycin. **(C) Left:** Fluorescence micrographs of 3-day-old biofilms exposed to propidium iodide. **Center:** Fluorescence micrographs of biofilms treated with tobramycin and PI. **Right:** Graphs showing quantification of PI staining. Images shown in this figure are representative of at least two independent experiments. The data underlying this figure can be found in S1\_raw\_data.
