# Supplementary material for: Cellular arrangement impacts metabolic activity and antibiotic tolerance in Pseudomonas aeruginosa biofilms
Source: PubMed Central journal article supplement (PMC10833521; doi:10.1371/journal.pbio.3002205), 2024-02-01
Supplement: pbio.3002205.s012.pdf [file pbio.3002205.s012.pdf]

**Table S1. Bacterial strains used in this study.**

| Number                                | Strain                                      | Description                                                                                                    | Source     |
|---------------------------------------|---------------------------------------------|----------------------------------------------------------------------------------------------------------------|------------|
| <i>Pseudomonas aeruginosa</i> strains |                                             |                                                                                                                |            |
| LD0                                   | UCBPP-PA14 (WT)                             | Clinical isolate UCBPP-PA14.                                                                                   | [1]        |
| LD4058                                | PA14 $\Delta vfr$                           | PA14 with <i>vfr</i> (PA14_08370) deleted. Made by mating pLD4042 into LD0.                                    | This study |
| LD732                                 | PA14 $\Delta pqsA-C$                        | PA14 with <i>pqsA-C</i> (PA14_51430, PA14_51420, and PA14_51410) deleted.                                      | [2]        |
| LD1380                                | PA14 $\Delta rhIR$                          | PA14 with <i>rhIR</i> (PA14_19120) deleted. Made by mating pLD1355 into LD0.                                   | [2]        |
| LD4555                                | PA14 $\Delta antABC$                        | PA14 with <i>antABC</i> (PA14_32160, PA14_32150, and PA14_32140) deleted. Made by mating pLD4537 into LD0.     | This study |
| LD24                                  | PA14 $\Delta phz$ (a.k.a. $\Delta phz1/2$ ) | PA14 with <i>phz</i> (PA14_09480-PA14_09410 and PA14_39970-PA14_39880) operons deleted.                        | [2]        |
| LD3679                                | PA14 $\Delta gacA$                          | PA14 with <i>gacA</i> (PA14_30650) deleted. Made by mating pLD3079 into LD0.                                   | This study |
| LD4213                                | PA14 $\Delta lasR$                          | PA14 with <i>lasR</i> (PA14_45960) deleted. Made by mating pLD4228 into LD0.                                   | This study |
| LD3596                                | PA14 $\Delta aer1$                          | PA14 with <i>aer1</i> (PA14_44300) deleted. Made by mating pLD3594 into LD0.                                   | This study |
| LD3604                                | PA14 $\Delta aer2$                          | PA14 with <i>aer2</i> (PA14_02220) deleted. Made by mating pLD3579 into LD0.                                   | This study |
| LD3607                                | PA14 $\Delta aer1 \Delta aer2$              | PA14 with <i>aer1</i> and <i>aer2</i> (PA14_44300 and PA14_02220) deleted. Made by mating pLD3594 into LD3604. | This study |
| LD2271                                | PA14 $\Delta nosP$                          | PA14 with <i>nosP</i> (PA14_38990 and PA14_38970) deleted. Made by mating LD2271 into LD0.                     | This study |
| LD915                                 | PA14 $\Delta anr$                           | PA14 with <i>anr</i> (PA14_44490) deleted.                                                                     | [3]        |
| LD369                                 | PA14 $\Delta pilB$                          | PA14 with <i>pilB</i> (PA14_58750) deleted.                                                                    | [4]        |
| LD1879                                | PA14 $\Delta pilY1$                         | PA14 with <i>pilY1</i> (PA14_60310) deleted. Made by mating pLD1858 into LD0.                                  | This study |
| LD3986                                | PA14 $\Delta pilA$                          | PA14 with <i>pilA</i> (PA14_58730) deleted. Made by mating pLD3979 into LD0.                                   | This study |
| LD4164                                | PA14 $\Delta pilT \Delta pilU$              | PA14 with <i>pilT pilU</i> (PA14_05180 and PA14_05190) deleted. Made by mating pLD4137 into LD0.               | This study |
| LD4644                                | PA14 $\Delta ssg$                           | PA14 with <i>ssg</i> (PA14_66120) deleted. Made by mating pLD4630 into LD0.                                    | This study |
| LD4913                                | PA14 $\Delta wapR$                          | PA14 with <i>wapR</i> (PA14_66110) deleted. Made by mating pLD4832 into LD0.                                   | This study |
| LD4635                                | PA14 $\Delta wbpM$                          | PA14 with <i>wbpM</i> (PA14_23470) deleted. Made by mating pLD4631 into LD0.                                   | This study |
| LD3950                                | PA14 $\Delta cheY$                          | PA14 with <i>cheY</i> (PA14_45620) deleted. Made by mating pLD3939 into LD0.                                   | This study |
| LD371                                 | PA14 $\Delta flgK$                          | PA14 with <i>flgK</i> (PA14_50360) deleted.                                                                    | [4]        |
| LD384                                 | PA14 $\Delta pilB \Delta flgK$              | PA14 with <i>pilB</i> and <i>flgK</i> (PA14_58750 and PA14_50360) deleted.                                     | [4]        |
| LD3621                                | PA14 $\Delta motA \Delta motB$              | PA14 with <i>motA</i> and <i>motB</i> (PA14_65450 and PA14_65430) deleted. Made by mating pLD3629 into LD0.    | This study |

|        |                                                                        |                                                                                                                                                              |            |
|--------|------------------------------------------------------------------------|--------------------------------------------------------------------------------------------------------------------------------------------------------------|------------|
| LD3622 | PA14 $\Delta$ <i>motC</i> $\Delta$ <i>motD</i>                         | PA14 with <i>motC</i> and <i>motD</i> (PA14_45560 and PA14_45540) deleted. Made by mating pLD3630 into LD0.                                                  | This study |
| LD1529 | PA14 $\Delta$ <i>cupA2</i>                                             | PA14 with <i>cupA2</i> (PA14_37040) deleted. Made by mating pLD1547 into LD0.                                                                                | This study |
| LD1726 | PA14 $\Delta$ <i>cupA</i> $\Delta$ <i>cupD</i>                         | PA14 with <i>cupD1</i> (PA14_59710) deleted. Made by mating pLD1704 into LD1529.                                                                             | This study |
| LD3070 | PA14 $\Delta$ <i>pelA-G</i>                                            | PA14 with <i>pelA-G</i> (PA14_24480, PA14_24490, PA14_24500, PA14_24510, PA14_24530, PA14_24550, and PA14_24560) deleted. Made by mating pLDLD3059 into LD0. | This study |
| LD3192 | PA14 $\Delta$ <i>rpoS</i>                                              | PA14 with <i>rpoS</i> (PA14_17480) deleted. Made by mating pLD3471 into LD0.                                                                                 | [5]        |
| LD3190 | PA14 $\Delta$ <i>rpoN</i>                                              | PA14 with <i>rpoN</i> (PA14_57940) deleted. Made by mating pLD3473 into LD0.                                                                                 | [5]        |
| LD3949 | PA14 $\Delta$ <i>fliA</i>                                              | PA14 with <i>fliA</i> (PA14_45630) deleted. Made by mating pLD3938 into LD0.                                                                                 | This study |
| LD3674 | PA14 $\Delta$ <i>crc</i>                                               | PA14 with <i>crc</i> (PA14_70390) deleted.                                                                                                                   | [5]        |
| LD3130 | PA14 $\Delta$ <i>ptsP</i>                                              | PA14 with <i>ptsP</i> (PA14_04410) deleted. Made by mating pLD3125 into LD0.                                                                                 | This study |
| LD3694 | PA14 $\Delta$ <i>ptsO</i>                                              | PA14 with <i>ptsO</i> (PA14_57980) deleted. Made by mating pLD3635 into LD0.                                                                                 | This study |
| LD3696 | PA14 $\Delta$ <i>ptsO</i> $\Delta$ <i>ptsP</i>                         | PA14 with <i>ptsO</i> and <i>ptsP</i> (PA14_04410 and PA14_57980) deleted. Made by mating pLD3635 into LD3130.                                               | This study |
| LD1888 | PA14 $\Delta$ <i>ccoN1</i> $\Delta$ <i>ccoN2</i>                       | PA14 with <i>ccoN1</i> and <i>ccoN2</i> (PA14_44370 and PA14_44340) deleted. Made by mating pLD1610 into LD1784.                                             | [6]        |
| LD1976 | PA14 $\Delta$ <i>ccoN1</i> $\Delta$ <i>ccoN2</i> $\Delta$ <i>ccoN4</i> | PA14 with <i>ccoN1</i> , <i>ccoN2</i> , and <i>ccoN4</i> (PA14_443470, PA14_44340, and PA14_10500) deleted. Made by mating pLD1264 into LD1888.              | [6]        |
| LD1933 | PA14 $\Delta$ <i>cco1</i> $\Delta$ <i>cco2</i>                         | PA14 with both <i>cco</i> operons (PA14_44340-PA14_44400) deleted simultaneously.                                                                            | [6]        |
| LD3196 | PA14 $\Delta$ <i>dipA</i>                                              | PA14 with <i>dipA</i> (PA14_66320) deleted. Made by mating pLD1204 into LD0.                                                                                 | This study |
| LD4687 | PA14 $\Delta$ <i>relA</i>                                              | PA14 with <i>relA</i> (PA14_52180) deleted. Made by mating pLD4642 into LD0.                                                                                 | [7]        |
| LD2177 | PA14 $\Delta$ <i>sadC</i>                                              | PA14 with <i>sadC</i> (PA14_56280) deleted. Made by mating pLD2173 into LD0.                                                                                 | [7]        |
| LD2569 | PA14 $\Delta$ <i>bifA</i>                                              | PA14 with <i>bifA</i> (PA14_56790) deleted. Made by mating pLD2565 into LD0.                                                                                 | [7]        |
| LD2183 | PA14 $\Delta$ <i>roeA</i>                                              | PA14 with <i>roeA</i> (PA14_50060) deleted. Made by mating pLD2179 into LD0.                                                                                 | [7]        |
| LD2227 | PA14 $\Delta$ <i>rmcA</i>                                              | PA14 with <i>rmcA</i> (PA14_07500) deleted. Made by mating pLD909 into LD0.                                                                                  | [7]        |
| LD2428 | PA14 $\Delta$ <i>wspR</i>                                              | PA14 with <i>wspR</i> (PA14_16500) deleted. Made by mating pLD4040 into LD0.                                                                                 | [7]        |
| LD3917 | PA14 $\Delta$ <i>cyaA</i>                                              | PA14 with <i>cyaA</i> (PA14_69610) deleted. Made by mating pLD3910 into LD0.                                                                                 | This study |
| LD3920 | PA14 $\Delta$ <i>cyaB</i>                                              | PA14 with <i>cyaB</i> (PA14_22620) deleted. Made by mating pLD3911 into LD0.                                                                                 | This study |
| LD3923 | PA14 $\Delta$ <i>cyaA</i> $\Delta$ <i>cyaB</i>                         | PA14 with <i>cyaA</i> <i>cyaB</i> (PA14_69610 and PA14_22620) deleted. Made by mating pLD3910 into LD3920 LD0.                                               | This study |
| LD3914 | PA14 $\Delta$ <i>cpdA</i>                                              | PA14 with <i>cpdA</i> (PA14_65690) deleted. Made by mating pLD3909 into LD0.                                                                                 | This study |
| LD3625 | PA14 $\Delta$ <i>ackA</i>                                              | PA14 with <i>ackA</i> (PA14_53470) deleted. Made by mating pLD3609 into LD0.                                                                                 | This study |

|        |                                                                                        |                                                                                                                        |            |
|--------|----------------------------------------------------------------------------------------|------------------------------------------------------------------------------------------------------------------------|------------|
| LD2729 | PA14 $\Delta$ <i>ldhA</i>                                                              | PA14 with <i>ldhA</i> (PA14_52270) deleted. Made by mating pLD2728 into LD0.                                           | [8]        |
| LD3646 | PA14 $\Delta$ <i>ldhA</i> $\Delta$ <i>ackA</i>                                         | PA14 with <i>ldhA ackA</i> (PA14_53470 and PA14_52270) deleted. Made by mating pLD2728 into LD3625.                    | This study |
| LD4833 | PA14 $\Delta$ <i>pilA</i> $\Delta$ <i>ssg</i>                                          | PA14 with <i>pilA ssg</i> (PA14_58730 and PA14_66120) deleted. Made by mating pLD4630 into LD3986.                     | This study |
| LD4836 | PA14 $\Delta$ <i>pilA</i> $\Delta$ <i>wbpM</i>                                         | PA14 with <i>pilA wbpM</i> (PA14_58730 and PA14_23470) deleted. Made by mating pLD4631 into LD3986.                    | This study |
| LD4839 | PA14 $\Delta$ <i>ssg</i> $\Delta$ <i>wbpM</i>                                          | PA14 with <i>ssg wbpM</i> (PA14_66120 and PA14_23470) deleted. Made by mating pLD4631 into LD4644.                     | This study |
| LD4835 | PA14 $\Delta$ <i>wbpM</i> $\Delta$ <i>ssg</i>                                          | PA14 with <i>wbpM ssg</i> (PA14_23470 and PA14_66120) deleted. Made by mating pLD4630 into LD4635.                     | This study |
| LD4764 | PA14 P <sub>A1/04/03</sub> -mScarlet                                                   | PA14 constitutively expressing mScarlet. Made by mating pLD3433 into LD0.                                              | This study |
| LD4070 | PA14 $\Delta$ <i>vfr</i><br>P <sub>A1/04/03</sub> -mScarlet                            | PA14 $\Delta$ <i>vfr</i> constitutively expressing mScarlet. Made by mating pLD3433 into LD4058.                       | This study |
| LD4007 | PA14 $\Delta$ <i>pqsA-C</i><br>P <sub>A1/04/03</sub> -mScarlet                         | PA14 $\Delta$ <i>pqsA-C</i> constitutively expressing mScarlet. Made by mating pLD3433 into LD732.                     | This study |
| LD4008 | PA14 $\Delta$ <i>rhIR</i><br>P <sub>A1/04/03</sub> -mScarlet                           | PA14 $\Delta$ <i>rhIR</i> constitutively expressing mScarlet. Made by mating pLD3433 into LD1380.                      | This study |
| LD4765 | PA14 $\Delta$ <i>antABC</i><br>P <sub>A1/04/03</sub> -mScarlet                         | PA14 $\Delta$ <i>antABC</i> constitutively expressing mScarlet. Made by mating pLD3433 into LD4555.                    | This study |
| LD3608 | PA14 $\Delta$ <i>phz</i> ( $\Delta$ <i>phz1/2</i> )<br>P <sub>A1/04/03</sub> -mScarlet | PA14 $\Delta$ <i>phz</i> constitutively expressing mScarlet. Made by mating pLD3433 into LD24.                         | This study |
| LD5074 | PA14 $\Delta$ <i>gacA</i><br>P <sub>A1/04/03</sub> -mScarlet                           | PA14 $\Delta$ <i>gacA</i> constitutively expressing mScarlet. Made by mating pLD3433 into LD3679.                      | This study |
| LD4763 | PA14 $\Delta$ <i>lasR</i><br>P <sub>A1/04/03</sub> -mScarlet                           | PA14 $\Delta$ <i>lasR</i> constitutively expressing mScarlet. Made by mating pLD3433 into LD4213.                      | This study |
| LD5075 | PA14 $\Delta$ <i>aer1</i><br>P <sub>A1/04/03</sub> -mScarlet                           | PA14 $\Delta$ <i>aer1</i> constitutively expressing mScarlet. Made by mating pLD3433 into LD3596.                      | This study |
| LD5076 | PA14 $\Delta$ <i>aer2</i><br>P <sub>A1/04/03</sub> -mScarlet                           | PA14 $\Delta$ <i>aer2</i> constitutively expressing mScarlet. Made by mating pLD3433 into LD3604.                      | This study |
| LD5077 | PA14 $\Delta$ <i>aer1</i> $\Delta$ <i>aer2</i><br>P <sub>A1/04/03</sub> -mScarlet      | PA14 $\Delta$ <i>aer1</i> $\Delta$ <i>aer2</i> constitutively expressing mScarlet. Made by mating pLD3433 into LD3607. | This study |
| LD4217 | PA14 $\Delta$ <i>nosP</i><br>P <sub>A1/04/03</sub> -mScarlet                           | PA14 $\Delta$ <i>nosP</i> constitutively expressing mScarlet. Made by mating pLD3433 into LD.                          | This study |
| LD4127 | PA14 $\Delta$ <i>anr</i><br>P <sub>A1/04/03</sub> -mScarlet                            | PA14 $\Delta$ <i>anr</i> constitutively expressing mScarlet. Made by mating pLD3433 into LD915.                        | This study |
| LD5078 | PA14 $\Delta$ <i>pilB</i><br>P <sub>A1/04/03</sub> -mScarlet                           | PA14 $\Delta$ <i>pilB</i> constitutively expressing mScarlet. Made by mating pLD3433 into LD369.                       | This study |
| LD5079 | PA14 $\Delta$ <i>pilY1</i><br>P <sub>A1/04/03</sub> -mScarlet                          | PA14 $\Delta$ <i>pilY1</i> constitutively expressing mScarlet. Made by mating pLD3433 into LD1879.                     | This study |

|        |                                                                   |                                                                                                        |            |
|--------|-------------------------------------------------------------------|--------------------------------------------------------------------------------------------------------|------------|
| LD3987 | PA14 $\Delta pilA$<br>P <sub>A1/04/03</sub> -mScarlet             | PA14 $\Delta pilA$ constitutively expressing mScarlet. Made by mating pLD3433 into LD3986.             | This study |
| LD4175 | PA14 $\Delta pilT \Delta pilU$<br>P <sub>A1/04/03</sub> -mScarlet | PA14 $\Delta pilT \Delta pilU$ constitutively expressing mScarlet. Made by mating pLD3433 into LD4164. | This study |
| LD4665 | PA14 $\Delta ssg$<br>P <sub>A1/04/03</sub> -mScarlet              | PA14 $\Delta ssg$ constitutively expressing mScarlet. Made by mating pLD3433 into LD4644.              | This study |
| LD4921 | PA14 $\Delta wapR$<br>P <sub>A1/04/03</sub> -mScarlet             | PA14 $\Delta wapR$ constitutively expressing mScarlet. Made by mating pLD3433 into LD4913.             | This study |
| LD4666 | PA14 $\Delta wbpM$<br>P <sub>A1/04/03</sub> -mScarlet             | PA14 $\Delta wbpM$ constitutively expressing mScarlet. Made by mating pLD3433 into LD4635.             | This study |
| LD3953 | PA14 $\Delta cheY$<br>P <sub>A1/04/03</sub> -mScarlet             | PA14 $\Delta cheY$ constitutively expressing mScarlet. Made by mating pLD3433 into LD3950.             | This study |
| LD5080 | PA14 $\Delta flgK$<br>P <sub>A1/04/03</sub> -mScarlet             | PA14 $\Delta flgK$ constitutively expressing mScarlet. Made by mating pLD3433 into LD371.              | This study |
| LD5081 | PA14 $\Delta pilb \Delta flgK$<br>P <sub>A1/04/03</sub> -mScarlet | PA14 $\Delta pilb \Delta flgK$ constitutively expressing mScarlet. Made by mating pLD3433 into LD384.  | This study |
| LD5082 | PA14 $\Delta motA \Delta motB$<br>P <sub>A1/04/03</sub> -mScarlet | PA14 $\Delta motA \Delta motB$ constitutively expressing mScarlet. Made by mating pLD3433 into LD3621. | This study |
| LD5083 | PA14 $\Delta motC \Delta motD$<br>P <sub>A1/04/03</sub> -mScarlet | PA14 $\Delta motC \Delta motD$ constitutively expressing mScarlet. Made by mating pLD3433 into LD3622. | This study |
| LD5084 | PA14 $\Delta cupA2$<br>P <sub>A1/04/03</sub> -mScarlet            | PA14 $\Delta cupA2$ constitutively expressing mScarlet. Made by mating pLD3433 into LD1529.            | This study |
| LD5085 | PA14 $\Delta cupA \Delta cupD$<br>P <sub>A1/04/03</sub> -mScarlet | PA14 $\Delta cupA \Delta cupD$ constitutively expressing mScarlet. Made by mating pLD3433 into LD1726. | This study |
| LD5086 | PA14 $\Delta pelA-G$<br>P <sub>A1/04/03</sub> -mScarlet           | PA14 $\Delta pelA-G$ constitutively expressing mScarlet. Made by mating pLD3433 into LD3070.           | This study |
| LD5087 | PA14 $\Delta rpoS$<br>P <sub>A1/04/03</sub> -mScarlet             | PA14 $\Delta rpoS$ constitutively expressing mScarlet. Made by mating pLD3433 into LD3192.             | This study |
| LD5088 | PA14 $\Delta rpoN$<br>P <sub>A1/04/03</sub> -mScarlet             | PA14 $\Delta rpoN$ constitutively expressing mScarlet. Made by mating pLD3433 into LD3190.             | This study |
| LD3951 | PA14 $\Delta fliA$<br>P <sub>A1/04/03</sub> -mScarlet             | PA14 $\Delta fliA$ constitutively expressing mScarlet. Made by mating pLD3433 into LD3949.             | This study |
| LD5089 | PA14 $\Delta crc$<br>P <sub>A1/04/03</sub> -mScarlet              | PA14 $\Delta crc$ constitutively expressing mScarlet. Made by mating pLD3433 into LD3674.              | This study |
| LD5090 | PA14 $\Delta ptsP$<br>P <sub>A1/04/03</sub> -mScarlet             | PA14 $\Delta ptsP$ constitutively expressing mScarlet. Made by mating pLD3433 into LD3130.             | This study |
| LD4008 | PA14 $\Delta ptsO$<br>P <sub>A1/04/03</sub> -mScarlet             | PA14 $\Delta ptsO$ constitutively expressing mScarlet. Made by mating pLD3433 into LD3694.             | This study |

|        |                                                                             |                                                                                                                |            |
|--------|-----------------------------------------------------------------------------|----------------------------------------------------------------------------------------------------------------|------------|
| LD4009 | PA14 $\Delta ptsO \Delta ptsP$<br>P <sub>A1/04/03</sub> -mScarlet           | PA14 $\Delta ptsO \Delta ptsP$ constitutively expressing mScarlet. Made by mating pLD3433 into LD3696.         | This study |
| LD2013 | PA14 $\Delta ccoN1 \Delta ccoN2$<br>P <sub>A1/04/03</sub> -YFP              | PA14 $\Delta ccoN1 \Delta ccoN2$ constitutively expressing YFP. Made by mating pLD68 into LD1888.              | [6]        |
| LD2136 | PA14 $\Delta ccoN1 \Delta ccoN2 \Delta ccoN4$<br>P <sub>A1/04/03</sub> -YFP | PA14 $\Delta ccoN1 \Delta ccoN2 \Delta ccoN4$ constitutively expressing YFP. Made by mating pLD68 into LD1976. | [6]        |
| LD2012 | PA14 $\Delta cco1 \Delta cco2$<br>P <sub>A1/04/03</sub> -YFP                | PA14 $\Delta cco1 \Delta cco$ constitutively expressing YFP. Made by mating pLD68 into LD1933.                 | [6]        |
| LD5091 | PA14 $\Delta dipA$<br>P <sub>A1/04/03</sub> -mScarlet                       | PA14 $\Delta dipA$ constitutively expressing mScarlet. Made by mating pLD3433 into LD3196.                     | This study |
| LD4766 | PA14 $\Delta relA$<br>P <sub>A1/04/03</sub> -mScarlet                       | PA14 $\Delta relA$ constitutively expressing mScarlet. Made by mating pLD3433 into LD4687.                     | This study |
| LD2925 | PA14 $\Delta sadC$<br>P <sub>A1/04/03</sub> -YFP                            | PA14 $\Delta sadC$ constitutively expressing YFP. Made by mating pLD68 into LD2177.                            | This study |
| LD2773 | PA14 $\Delta bifA$<br>P <sub>A1/04/03</sub> -YFP                            | PA14 $\Delta bifA$ constitutively expressing YFP. Made by mating pLD68 into LD2569.                            | This study |
| LD2183 | PA14 $\Delta roeA$<br>P <sub>A1/04/03</sub> -YFP                            | PA14 $\Delta roeA$ constitutively expressing YFP. Made by mating pLD68 into LD2183.                            | This study |
| LD2775 | PA14 $\Delta rmcA$<br>P <sub>A1/04/03</sub> -YFP                            | PA14 $\Delta rmcA$ constitutively expressing YFP. Made by mating pLD68 into LD2227.                            | This study |
| LD2488 | PA14 $\Delta wspR$<br>P <sub>A1/04/03</sub> -YFP                            | PA14 $\Delta wspR$ constitutively expressing YFP. Made by mating pLD68 into LD2428.                            | This study |
| LD4069 | PA14 $\Delta cyaA \Delta cyaB$<br>P <sub>A1/04/03</sub> -mScarlet           | PA14 $\Delta cyaA \Delta cyaB$ constitutively expressing mScarlet. Made by mating pLD3433 into LD3923.         | This study |
| LD4062 | PA14 $\Delta cpdA$<br>P <sub>A1/04/03</sub> -mScarlet                       | PA14 $\Delta cpdA$ constitutively expressing mScarlet. Made by mating pLD3433 into LD3914.                     | This study |
| LD5092 | PA14 $\Delta ackA$<br>P <sub>A1/04/03</sub> -mScarlet                       | PA14 $\Delta ackA$ constitutively expressing mScarlet. Made by mating pLD3433 into LD3625.                     | This study |
| LD5093 | PA14 $\Delta ldhA$<br>P <sub>A1/04/03</sub> -mScarlet                       | PA14 $\Delta ldhA$ constitutively expressing mScarlet. Made by mating pLD3433 into LD2729.                     | This study |
| LD5094 | PA14 $\Delta pilA \Delta ssg$<br>P <sub>A1/04/03</sub> -mScarlet            | PA14 $\Delta pilA \Delta ssg$ constitutively expressing mScarlet. Made by mating pLD3433 into LD3646.          | This study |
| LD4850 | PA14 $\Delta pilA \Delta wbpM$<br>P <sub>A1/04/03</sub> -mScarlet           | PA14 $\Delta pilA \Delta wbpM$ constitutively expressing mScarlet. Made by mating pLD3433 into LD4833.         | This study |
| LD4853 | PA14 $\Delta ldhA \Delta ackA$<br>P <sub>A1/04/03</sub> -mScarlet           | PA14 $\Delta ldhA \Delta ackA$ constitutively expressing mScarlet. Made by mating pLD3433 into LD4836.         | This study |
| LD4852 | PA14 $\Delta wbpM \Delta ssg$<br>P <sub>A1/04/03</sub> -mScarlet            | PA14 $\Delta wbpM \Delta ssg$ constitutively expressing mScarlet. Made by mating pLD3433 into LD4835.          | This study |

|                                         |                                                                      |                                                                                                                                                                                                                                                                                                                                                                     |            |
|-----------------------------------------|----------------------------------------------------------------------|---------------------------------------------------------------------------------------------------------------------------------------------------------------------------------------------------------------------------------------------------------------------------------------------------------------------------------------------------------------------|------------|
| LD4855                                  | PA14 $\Delta$ ssg $\Delta$ wbpM<br>P <sub>A1/04/03</sub> -mScarlet   | PA14 $\Delta$ ssg $\Delta$ wbpM constitutively expressing mScarlet. Made by mating pLD3433 into LD4839.                                                                                                                                                                                                                                                             | This study |
| LD3801                                  | PA14 WT<br>P <sub>A1/04/03</sub> -eGFP                               | PA14 constitutively expressing eGFP. Made by mating pLD3655 into LD0.                                                                                                                                                                                                                                                                                               | This study |
| LD4292                                  | PA14 $\Delta$ pilA<br>P <sub>A1/04/03</sub> -eGFP                    | PA14 constitutively expressing eGFP. Made by mating pLD3655 into LD3986.                                                                                                                                                                                                                                                                                            | This study |
| LD4842                                  | PA14 $\Delta$ wbpM<br>P <sub>A1/04/03</sub> -eGFP                    | PA14 constitutively expressing eGFP. Made by mating pLD3655 into LD4635.                                                                                                                                                                                                                                                                                            | This study |
| LD5047                                  | PA14 $\Delta$ wbpM $\Delta$ pilA<br>P <sub>A1/04/03</sub> -eGFP      | PA14 constitutively expressing eGFP. Made by mating pLD3655 into LD4836.                                                                                                                                                                                                                                                                                            | This study |
| LD4291                                  | PA14 $\Delta$ gacA<br>P <sub>A1/04/03</sub> -eGFP                    | PA14 constitutively expressing eGFP. Made by mating pLD3655 into LD3679.                                                                                                                                                                                                                                                                                            | This study |
| LD4373                                  | PA14 WT<br>attB::rhaSR-PrhaBAD-<br>mScarlet                          | PA14 attB::rhaSR-PrhaBAD-mScarlet. Made by mating pLD4358 into LD0.                                                                                                                                                                                                                                                                                                 | This study |
| LD4374                                  | PA14 $\Delta$ gacA<br>attB::rhaSR-PrhaBAD-<br>mScarlet               | PA14 attB::rhaSR-PrhaBAD-mScarlet. Made by mating pLD4358 into LD3679.                                                                                                                                                                                                                                                                                              | This study |
| LD4376                                  | PA14 $\Delta$ pilA<br>attB::rhaSR-PrhaBAD-<br>mScarlet               | PA14 attB::rhaSR-PrhaBAD-mScarlet. Made by mating pLD4358 into LD3986.                                                                                                                                                                                                                                                                                              | This study |
| LD4992                                  | PA14 $\Delta$ wbpM<br>attB::rhaSR-PrhaBAD-<br>mScarlet               | PA14 attB::rhaSR-PrhaBAD-mScarlet. Made by mating pLD4358 into LD4635.                                                                                                                                                                                                                                                                                              | This study |
| LD5052                                  | PA14 $\Delta$ wbpM $\Delta$ pilA<br>attB::rhaSR-PrhaBAD-<br>mScarlet | PA14 attB::rhaSR-PrhaBAD-mScarlet. Made by mating pLD4358 into LD4836.                                                                                                                                                                                                                                                                                              | This study |
| <i>E. coli</i> strains                  |                                                                      |                                                                                                                                                                                                                                                                                                                                                                     |            |
| LD44                                    | UQ950                                                                | <i>E. coli</i> DH5 $\alpha$ $\lambda$ (pir) host for cloning; F- $\Delta$ ( <i>argF-lac</i> )169 $\Phi$ 80 <i>dlacZ58</i> ( $\Delta$ M15) <i>glnV44</i> (AS) <i>rfdD1</i> <i>gyrA96</i> (NalR) <i>recA1</i> <i>endA1</i> <i>spoT1</i> <i>thi-1</i> <i>hsdR17</i> <i>deoR</i> $\lambda$ pir+                                                                         | D. Lies    |
| LD661                                   | BW29427                                                              | Donor strain for conjugation: <i>thrB1004</i> <i>pro</i> <i>thi</i> <i>rpsL</i> <i>hsdS</i> <i>lacZ</i> $\Delta$ M15RP4–1360 $\Delta$ ( <i>araBAD</i> )567 $\Delta$ <i>dapA1341</i> ::[ <i>erm</i> <i>pir</i> (wt)]                                                                                                                                                 | W. Metcalf |
| LD69                                    | $\beta$ 2155                                                         | Helper strain. <i>thrB1004</i> <i>pro</i> <i>thi</i> <i>strA</i> <i>hsdsS</i> <i>lacZ</i> $\Delta$ M15 ( <i>F'</i> <i>lacZ</i> $\Delta$ M15 <i>lac</i> <sup>n</sup> <i>tra</i> $\Delta$ 36 <i>proA</i> <sup>+</sup> <i>proB</i> <sup>+</sup> ) $\Delta$ <i>dapA</i> :: <i>erm</i> (Erm <sup>r</sup> ) <i>pir</i> ::RP4 [:: <i>kan</i> (Km <sup>r</sup> ) from SM10] | [9]        |
| LD2901                                  | S17-1                                                                | Str <sup>R</sup> , Tp <sup>R</sup> , F- RP4-2-Tc::Mu <i>aphA</i> ::Tn7 <i>recA</i> $\lambda$ pir lysogen                                                                                                                                                                                                                                                            | R. Simon   |
| <i>Saccharomyces cerevisiae</i> strains |                                                                      |                                                                                                                                                                                                                                                                                                                                                                     |            |
| LD676                                   | InvSc1                                                               | <i>MAT<math>\alpha</math>/MAT<math>\alpha</math></i> <i>leu2/leu2</i> <i>trp1-289/trp1-289</i> <i>ura3-52/ura3-52</i> <i>his3-<math>\Delta</math>1/his3-<math>\Delta</math>1</i>                                                                                                                                                                                    | Invitrogen |

1. Rahme LG, Stevens EJ, Wolfort SF, Shao J, Tompkins RG, Ausubel FM. Common virulence factors for bacterial pathogenicity in plants and animals. *Science*. 1995;268: 1899–1902.
2. Recinos DA, Sekedat MD, Hernandez A, Cohen TS, Sakhtah H, Prince AS, et al. Redundant phenazine operons in *Pseudomonas aeruginosa* exhibit environment-dependent expression and differential roles in pathogenicity. *Proc Natl Acad*

- Sci U S A. 2012;109: 19420–19425.
3. Lin Y-C, Sekedat MD, Cornell WC, Silva GM, Okegbe C, Price-Whelan A, et al. Phenazines regulate Nap-dependent denitrification in *Pseudomonas aeruginosa* biofilms. *J Bacteriol.* 2018. doi:10.1128/JB.00031-18
  4. Hölscher T, Bartels B, Lin Y-C, Gallegos-Monterrosa R, Price-Whelan A, Kolter R, et al. Motility, Chemotaxis and Aerotaxis Contribute to Competitiveness during Bacterial Pellicle Biofilm Development. *J Mol Biol.* 2015;427: 3695–3708.
  5. Evans CR, Smiley MK, Thio SA, Wei M, Price-Whelan A, Min W, et al. Spatial heterogeneity in biofilm metabolism elicited by local control of phenazine methylation. *bioRxiv.* 2023. doi:10.1101/2023.02.15.528762
  6. Jo J, Cortez KL, Cornell WC, Price-Whelan A, Dietrich LE. An orphan cbb3-type cytochrome oxidase subunit supports *Pseudomonas aeruginosa* biofilm growth and virulence. *Elife.* 2017;6. doi:10.7554/eLife.30205
  7. Okegbe C, Fields BL, Cole SJ, Beierschmitt C, Morgan CJ, Price-Whelan A, et al. Electron-shuttling antibiotics structure bacterial communities by modulating cellular levels of c-di-GMP. *Proc Natl Acad Sci U S A.* 2017;114: E5236–E5245.
  8. Lin Y-C, Cornell WC, Jo J, Price-Whelan A, Dietrich LEP. The *Pseudomonas aeruginosa* Complement of Lactate Dehydrogenases Enables Use of d- and l-Lactate and Metabolic Cross-Feeding. *MBio.* 2018;9. doi:10.1128/mBio.00961-18
  9. Dehio C, Meyer M. Maintenance of broad-host-range incompatibility group P and group Q plasmids and transposition of Tn5 in *Bartonella henselae* following conjugal plasmid transfer from *Escherichia coli*. *J Bacteriol.* 1997;179: 538–540.
