# Supplementary material for: Cellular arrangement impacts metabolic activity and antibiotic tolerance in Pseudomonas aeruginosa biofilms
Source: PubMed Central journal article supplement (PMC10833521; doi:10.1371/journal.pbio.3002205), 2024-02-01
Supplement: pbio.3002205.s013.pdf [file pbio.3002205.s013.pdf]

**Table S2. Plasmids used in this study.**

| Plasmid Name | Description                                                                                                                                                                                                   | Source     |
|--------------|---------------------------------------------------------------------------------------------------------------------------------------------------------------------------------------------------------------|------------|
| pMQ30        | Yeast-based allelic-exchange vector; <i>sacB</i> <sup>+</sup> , CEN/ARSH, URA3 <sup>+</sup> , Gm <sup>R</sup> .                                                                                               | [1]        |
| pFLP2        | Site-specific excision vector with cl857-controlled FLP recombinase. encoding sequence, <i>sacB</i> <sup>+</sup> , Amp <sup>R</sup> . Used to insert LD2722-based plasmids into <i>P. aeruginosa</i> strains. | [2]        |
| pLD2722      | Gm <sup>R</sup> , Tet <sup>R</sup> flanked by Flp recombinase target (FRT) sites to resolve out resistance cassettes.                                                                                         | [3]        |
| pLD68        | Gm <sup>R</sup> , Cm <sup>R</sup> mini-Tn7 <i>P</i> <sub>A11/04/03</sub> - <i>yfp</i>                                                                                                                         | [1]        |
| pLD3433      | Gm <sup>R</sup> , Cm <sup>R</sup> mini-Tn7 <i>P</i> <sub>A11/04/03</sub> - <i>mScarlet</i>                                                                                                                    | This study |
| pLD3655      | Gm <sup>R</sup> , Cm <sup>R</sup> mini-Tn7 <i>P</i> <sub>A11/04/03</sub> -eGFP                                                                                                                                | This study |
| pLD4042      | $\Delta vfr$ ( <i>PA14_08370</i> ) PCR fragment introduced into pMQ30 by gap repair cloning in yeast strain InvSc1.                                                                                           | This study |
| pLD4537      | $\Delta antABC$ ( <i>PA14_32160</i> , <i>PA14_32150</i> , and <i>PA14_32140</i> ) PCR fragment introduced into pMQ30 by gap repair cloning in yeast strain InvSc1.                                            | This study |
| pLD3079      | $\Delta gacA$ ( <i>PA14_30650</i> ) PCR fragment introduced into pMQ30 by gap repair cloning in yeast strain InvSc1.                                                                                          | This study |
| pLD4228      | $\Delta lasR$ ( <i>PA14_45960</i> ) PCR fragment introduced into pMQ30 by gap repair cloning in yeast strain InvSc1.                                                                                          | This study |
| pLD3594      | $\Delta aer1$ ( <i>PA14_44300</i> ) PCR fragment introduced into pMQ30 by gap repair cloning in yeast strain InvSc1.                                                                                          | This study |
| pLD3579      | $\Delta aer2$ ( <i>PA14_02220</i> ) PCR fragment introduced into pMQ30 by gap repair cloning in yeast strain InvSc1.                                                                                          | This study |
| pLD3594      | $\Delta aer1 \Delta aer2$ ( <i>PA14_44300</i> and <i>PA14_02220</i> ) PCR fragment introduced into pMQ30 by gap repair cloning in yeast strain InvSc1.                                                        | This study |
| pLD3979      | $\Delta pilA$ ( <i>PA14_58730</i> ) PCR fragment introduced into pMQ30 by gap repair cloning in yeast strain InvSc1.                                                                                          | This study |
| pLD4137      | $\Delta pilT \Delta pilU$ ( <i>PA14_05180</i> and <i>PA14_05190</i> ) PCR fragment introduced into pMQ30 by gap repair cloning in yeast strain InvSc1.                                                        | This study |
| pLD4630      | $\Delta ssg$ ( <i>PA14_66120</i> ) PCR fragment introduced into pMQ30 by gap repair cloning in yeast strain InvSc1.                                                                                           | This study |
| pLD4832      | $\Delta wapR$ ( <i>PA14_66110</i> ) PCR fragment introduced into pMQ30 by gap repair cloning in yeast strain InvSc1.                                                                                          | This study |

|         |                                                                                                                                                                                                                               |            |
|---------|-------------------------------------------------------------------------------------------------------------------------------------------------------------------------------------------------------------------------------|------------|
| pLD4631 | $\Delta wbpM$ (PA14_23470) PCR fragment introduced into pMQ30 by gap repair cloning in yeast strain InvSc1.                                                                                                                   | This study |
| pLD3939 | $\Delta cheY$ (PA14_45620) PCR fragment introduced into pMQ30 by gap repair cloning in yeast strain InvSc1.                                                                                                                   | This study |
| pLD3629 | $\Delta motA \Delta motB$ (PA14_65450 and PA14_65430) PCR fragment introduced into pMQ30 by gap repair cloning in yeast strain InvSc1.                                                                                        | This study |
| pLD3630 | $\Delta motC \Delta motD$ (PA14_45560 and PA14_45540) PCR fragment introduced into pMQ30 by gap repair cloning in yeast strain InvSc1.                                                                                        | This study |
| pLD3938 | $\Delta fliA$ (PA14_45630) PCR fragment introduced into pMQ30 by gap repair cloning in yeast strain InvSc1.                                                                                                                   | This study |
| pLD3635 | $\Delta ptsP$ (PA14_04410) PCR fragment introduced into pMQ30 by gap repair cloning in yeast strain InvSc1.                                                                                                                   | This study |
| pLD1204 | $\Delta dipA$ (PA14_66320) PCR fragment introduced into pMQ30 by gap repair cloning in yeast strain InvSc1.                                                                                                                   | This study |
| pLD3910 | $\Delta cyaA$ PA14_69610 PCR fragment introduced into pMQ30 by gap repair cloning in yeast strain InvSc1.                                                                                                                     | This study |
| pLD3909 | $\Delta cpdA$ (PA14_65690) PCR fragment introduced into pMQ30 by gap repair cloning in yeast strain InvSc1.                                                                                                                   | This study |
| pLD3609 | $\Delta ackA$ (PA14_53470) PCR fragment introduced into pMQ30 by gap repair cloning in yeast strain InvSc1.                                                                                                                   | This study |
| pJM260  | miniCTX1-rhaSR-PrhaBAD-stRBS-aacC1                                                                                                                                                                                            | [4]        |
| pLD3208 | MCS-mScarlet GmR, TetR flanked by Flp recombinase target (FRT) sites to resolve out resistance cassettes. Cloned by swapping gfp sequence with mScarlet (XhoI + SacI).                                                        | [5]        |
| pLD4358 | Gm <sup>R</sup> , Cm <sup>R</sup> mini-Tn7 $P_{A1/04/03}::rhaSR-PrhaBAD$ mScarlet. The <i>rhaSR-PrhaBAD</i> promoter was amplified from pJM260 using primers LD3920 and LD3920 and inserted into pLD3208 using SpeI and XhoI. | This study |

1. Shanks RMQ, Caiazza NC, Hinsla SM, Toutain CM, O'Toole GA. Saccharomyces cerevisiae-based molecular tool kit for manipulation of genes from gram-negative bacteria. Appl Environ Microbiol. 2006;72: 5027–5036.
2. Hoang TT, Karkhoff-Schweizer RR, Kutchma AJ, Schweizer HP. A broad-host-range Flp-FRT recombination system for site-specific excision of chromosomally-located DNA sequences: application for isolation of unmarked Pseudomonas aeruginosa mutants. Gene. 1998;212: 77–86.
3. Jo J, Cortez KL, Cornell WC, Price-Whelan A, Dietrich LE. An orphan cbb3-type cytochrome oxidase subunit supports Pseudomonas aeruginosa biofilm growth and virulence. Elife. 2017;6. doi:10.7554/eLife.30205
4. Meisner J, Goldberg JB. The Escherichia coli rhaSR-PrhaBAD Inducible Promoter System Allows Tightly Controlled Gene Expression over a Wide Range in Pseudomonas aeruginosa. Appl Environ Microbiol. 2016;82: 6715–6727.
5. Wang B, Lin Y-C, Vasquez-Rifo A, Jo J, Price-Whelan A, McDonald ST, et al. Pseudomonas aeruginosa PA14 produces R-bodies, extendable protein polymers with roles in host colonization and virulence. Nat Commun. 2021;12: 1–14.
