# Supplementary material for: Cellular arrangement impacts metabolic activity and antibiotic tolerance in Pseudomonas aeruginosa biofilms
Source: PubMed Central journal article supplement (PMC10833521; doi:10.1371/journal.pbio.3002205), 2024-02-01
Supplement: pbio.3002205.s014.pdf [file pbio.3002205.s014.pdf]

| Primer                                                      | Sequence                                                     |
|-------------------------------------------------------------|--------------------------------------------------------------|
| Primers for plasmid pLD4042 (used to make $\Delta vfr$ )    |                                                              |
| 3611                                                        | cctgcaggtcgactctagagGGGAGAAGATGGACGAACTG                     |
| 3612                                                        | CTACACCGCAAAGAGCACCTGGTGCATGTGAAAGGAAA                       |
| 3613                                                        | TTTCCTTTCACATGCACCAGGGTGCTCTTTGCGGTGTAG                      |
| 3614                                                        | cagctatgaccatgattacg GATGGCGATTGTGGTTTGT                     |
| Primers for plasmid pLD4537 (used to make $\Delta antABC$ ) |                                                              |
| 3962                                                        | ggcaaattctgtttatcagaccgcttctgcgttctgatTCAGTCCCTTGATCAGCGC    |
| 3963                                                        | GTCGAAATGCTCGTGCAGGTACAGCTCCGGTTCGGTGAAC                     |
| 3964                                                        | GTTACCCGAACCGGAGCTGTACCTGCACGAGCATTTCGAC                     |
| 3965                                                        | aattgtgagcggataacaatttcacacaggaacagctCCCGGCGAATTTCTACTACGA   |
| Primers for plasmid pLD3079 (used to make $\Delta gacA$ )   |                                                              |
| 1932                                                        | ccaggcaaattctgtttatcagaccgcttctgcgttctgatAGCGTGCGACGTTATGTCT |
| 1933                                                        | gaagatgcggtagcgaatagACCACTTGCAAGCCTTCG                       |
| 1934                                                        | cgaaggcttgaagtggctCTATCGCTACCGCATCTTC                        |
| 1935                                                        | ggaattgtgagcggataacaatttcacacaggaacagctTCACGTTGACGATCAACTCC  |
| Primers for plasmid pLD4228 (used to make $\Delta lasR$ )   |                                                              |
| 3813                                                        | cctgcaggtcgactctagagACAGGTCCCCGTCATGAAAC                     |
| 3814                                                        | GTTTTCTTGAGCTGGAACGCATGGCCGTTAATTTGGGTCT                     |
| 3815                                                        | AGACCCAAATTAACGGCCATGCGTTCAGCTCAAGAAAAC                      |
| 3816                                                        | cagctatgaccatgattacgGATCAACATGGTCACCTCCA                     |
| Primers for plasmid pLD3594 (used to make $\Delta aer1$ )   |                                                              |
| 2958                                                        | aggcaaattctgtttatcagaccgcttctgcgttctgatTGGAACCGAAGGACTTCAAC  |
| 2942                                                        | CTCGTCGGAGGTCTGCTCTTTGAGATTGGTGGTGGTGA                       |
| 2943                                                        | TCACCACCACCAATCTCAAAGAGCAGACCTCCGACGAG                       |
| 2944                                                        | ggaattgtgagcggataacaatttcacacaggaacagctAGATCCTCTGCGGCGATT    |
| Primers for plasmid pLD3579 (used to make $\Delta aer2$ )   |                                                              |
| 2950                                                        | aggcaaattctgtttatcagaccgcttctgcgttctgatCACGGTGACGATCACCAGGT  |
| 2951                                                        | CTCCAGTCGTTCCGCGACAGCGTGGTCCAGCTCGCC                         |
| 2952                                                        | GGCGAGCTGGACCACGCTGTCGGCGAACGACTGGAG                         |
| 2953                                                        | ggaattgtgagcggataacaatttcacacaggaacagctCTGGCAACTGGTGTTCATGC  |
| Primers for plasmid pLD3979 (used to make $\Delta pilA$ )   |                                                              |
| 3583                                                        | aggcaaattctgtttatcagaccgcttctgcgttctgatCCTCACCTCTGAACGAATC   |
| 3584                                                        | GATTACACCATTCGTGCTCG ATCCAATGCGGTTTCCAGT                     |
| 3585                                                        | ACTGGAACCGCATTGGAT CGAGCACGAATGGTGTAAATC                     |
| 3586                                                        | ggaattgtgagcggataacaatttcacacaggaacagctACTTCATGGAGCATGCCATC  |

| Primers for plasmid pLD4137 (used to make $\Delta pilT \Delta pilU$ ) |                                                               |
|-----------------------------------------------------------------------|---------------------------------------------------------------|
| 3666                                                                  | aggcaaattctgtttatcagaccgcttctgcgttctgatGAACGCTATGCGGGGTGT     |
| 3667                                                                  | GTCAGGTTTCGACAGGTGGTC GGAGAGGTGCAGGTCCGAAG                    |
| 3668                                                                  | CTTCGGACCTGCACCTCTCC GACCACCTGTGGAACCTGAC                     |
| 3669                                                                  | ggaattgtgagcggataacaatttcacacaggaacagctGCCTATCCTGTAGGCTGGTG   |
| Primers for plasmid pLD4630 (used to make $\Delta ssg$ )              |                                                               |
| 4193                                                                  | aggcaaattctgtttatcagaccgcttctgcgttctgatAGAAAAACAACCGCGCAAT    |
| 4194                                                                  | GGCTACTTCCGCAAGCACGCCGCTGTCCGGTCAGAGTATC                      |
| 4195                                                                  | GATACTCTGACCGACAGCGGCGTGCTTGCGGAAGTAGCC                       |
| 4196                                                                  | ggaattgtgagcggataacaatttcacacaggaacagctTACCTGAACCTGACGGGACT   |
| Primers for plasmid pLD4832 (used to make $\Delta wapR$ )             |                                                               |
| 4349                                                                  | aggcaaattctgtttatcagaccgcttctgcgttctgatGGCATGATCGTGGCTTATATC  |
| 4350                                                                  | CAGACGTACCGCAACGTCTCGAACCGGGACAAGGT                           |
| 4351                                                                  | ACCTTGTCGCCGTTTCGAGACGTTGCGGTACGTCTG                          |
| 4352                                                                  | ggaattgtgagcggataacaatttcacacaggaacagctAAGAATTCGAGGCGATGG     |
| Primers for plasmid pLD4631 (used to make $\Delta wbpM$ )             |                                                               |
| 4201                                                                  | aggcaaattctgtttatcagaccgcttctgcgttctgatCATGGATGGCATTGATGGTA   |
| 4202                                                                  | GTAGTCGTCCTTCTCCACGGCGAAGGCTAGCCAGAGCGATA                     |
| 4203                                                                  | TATCGCTCTGGCTAGCCTTCGCCGTGGAGAAGGACGACTAC                     |
| 4204                                                                  | ggaattgtgagcggataacaatttcacacaggaacagctGGTGATCCGCACCAACTATT   |
| Primers for plasmid pLD3939 (used to make $\Delta cheY$ )             |                                                               |
| 3424                                                                  | aggcaaattctgtttatcagaccgcttctgcgttctgat CCCAGAGACGTGTTACTCGAA |
| 3425                                                                  | TCAACGGCTATGTGGTCAAAGGACTTGGGCTTCACCAATA                      |
| 3426                                                                  | TATTGGTGAAGCCCAAGTCCTCAACGGCTATGTGGTCAA                       |
| 3427                                                                  | ggaattgtgagcggataacaatttcacacaggaacagctGAGCCGTATACGAGGCATTC   |
| Primers for plasmid pLD3629 (used to make $\Delta motA \Delta motB$ ) |                                                               |
| 2994                                                                  | aggcaaattctgtttatcagaccgcttctgcgttctgatGCATCGAAAAGATCCAGGAA   |
| 2995                                                                  | ATCCAGCCCTTCGAGGTCGTGCAGAAGAAGCTCAACC                         |
| 2996                                                                  | GGTTGAGCTTCTTCTGCACGACCTCGAAGGGCTGGAT                         |
| 2997                                                                  | ggaattgtgagcggataacaatttcacacaggaacagctACCTGCTGCTGGACTTCG     |
| Primers for plasmid pLD3630 (used to make $\Delta motC \Delta motD$ ) |                                                               |
| 3002                                                                  | aggcaaattctgtttatcagaccgcttctgcgttctgatGTAGGACTGCAAGGCCAGTT   |
| 3003                                                                  | ATCATCCTGGCGTTCGTCCGCACGCAAGCTGCAGATACT                       |
| 3004                                                                  | AGTATCTGCAGCTTGCGTGCCGACGAACGCCAGGATGAT                       |
| 3005                                                                  | ggaattgtgagcggataacaatttcacacaggaacagctCCGGTCCTGATGTTCTCCT    |

| Primers for plasmid pLD3938 (used to make $\Delta$ <i>fliA</i> ) |                                                              |
|------------------------------------------------------------------|--------------------------------------------------------------|
| 3484                                                             | aggcaaattctgtttatcagaccgcttctgcgttctgatGAACTGTTTCGATGCGCTTG  |
| 3485                                                             | CATCGCCTATCACCTGCTCGAGGAGATCGGCGAGGTAAGT                     |
| 3486                                                             | CAGTACCTCGCCGATCTCCTCGAGCAGGTGATAGGCGATG                     |
| 3487                                                             | ggaattgtgagcggataacaatttcacacaggaacagctCATCGTTCCTCCGCAATAC   |
| Primers for plasmid pLD3635 (used to make $\Delta$ <i>ptsP</i> ) |                                                              |
| 2475                                                             | aggcaaattctgtttatcagaccgcttctgcgttctgatCGGCTCGATCACTTCCTGCA  |
| 2476                                                             | ctgcgggtgtcgaaggtgagCATGGCTTCCTTGACCCGCTG                    |
| 2477                                                             | cagcgggtcaaggaagccatgCTCACCTTCGACAACCCGCAG                   |
| 2478                                                             | ggaattgtgagcggataacaatttcacacaggaacagctGATGAACTCCTCGCCGCC    |
| Primers for plasmid pLD1204 (used to make $\Delta$ <i>dipA</i> ) |                                                              |
| 2611                                                             | ggaattgtgagcggataacaatttcacacaggaacagctGCAGCAACTGGTGAAGCGC   |
| 2612                                                             | GCAGCTCGCTGAGGTTCTcgcGCGCCGGAAGCTCGGA                        |
| 2613                                                             | TCCGAGCTTCCGGCGCgcgAGAACCTCAGCGAGCTGCT                       |
| 2614                                                             | ccaggcaaattctgtttatcagaccgcttctgcgttctgatATCTGCAGCTCGCCCAG   |
| Primers for plasmid pLD3910 (used to make $\Delta$ <i>cyaA</i> ) |                                                              |
| 3502                                                             | cctgcaggctgactctagagCAGCTCAATCCCTACCCCTA                     |
| 3503                                                             | TAACGCAGATAGTGCAGCGTGTTCGAGATCGAGGCTGAGTG                    |
| 3504                                                             | CACTCAGCCTCGATCTCGACACGCTGCACTATCTGCGTTA                     |
| 3505                                                             | cagctatgaccatgattacgAAGGCAAGGTCTCGATCCTC                     |
| Primers for plasmid pLD3909 (used to make $\Delta$ <i>cpdA</i> ) |                                                              |
| 3494                                                             | cctgcaggctgactctagagGTCGATGACTTCCAGCGAGT                     |
| 3495                                                             | CGTACTGCTGGTGCAGCTTTTCGAAGTGGACTACGACACC                     |
| 3496                                                             | GGTGTCGTAGTCCACTTCGAAAAGCTGCACCAGCAGTACG                     |
| 3497                                                             | cagctatgaccatgattacg CCTGATCGACAAGGACGAG                     |
| Primers for plasmid pLD3609 (used to make $\Delta$ <i>ackA</i> ) |                                                              |
| 3022                                                             | caggcaaattctgtttatcagaccgcttctgcgttctgatCAATCGGCGAATGAACGCCG |
| 3023                                                             | GGATCACCAGTACCCGCGGGTGCAGGGGAAACAGGGAGT                      |
| 3024                                                             | ACTCCCTGTTTCCCCTGCACCCGCGGGTACTGGTGATCC                      |
| 3025                                                             | ggaattgtgagcggataacaatttcacacaggaacagctCGTGCGCTGAGCAGATCG    |
| Primers for plasmid pLD4358 (used to make pSEK109-rhaSR-PrhaBAD) |                                                              |
| 3920                                                             | gattcgactgcactagtTTAATCTTTCTGCGAATTGAGATGAC                  |
| 3921                                                             | gattcgactgcctcgagTACGACCAGTCTAAAAAGCGC                       |
